# Supplementary material for: Tuning anhydrous proton conduction in single-ion polymers by crystalline ion channels
Source: PubMed Central journal article supplement (PMC6261987; doi:10.1038/s41467-018-07503-4), 2018-11-28
Supplement: 41467_2018_7503_MOESM1_ESM.pdf [file 41467_2018_7503_MOESM1_ESM.pdf]

**Supplementary Information**

**Tuning Anhydrous Proton Conduction in Single-Ion Polymers by  
Crystalline Ion Channels**

Onnuri Kim<sup>1§</sup>, Kyoungwook Kim<sup>2§</sup>, U Hyeok Choi<sup>3</sup>, and Moon Jeong Park<sup>1,2\*</sup>

<sup>1</sup>Department of Chemistry, <sup>2</sup>Division of Advanced Materials Science, Pohang University of  
Science and Technology (POSTECH), Pohang, Korea 790-784,

<sup>3</sup>Department of Polymer Engineering, Pukyong National University, Busan, Korea 608-737.

§ These two authors contributed equally.

\* Corresponding author

(moonpark@postech.ac.kr)

## Supplementary Figures

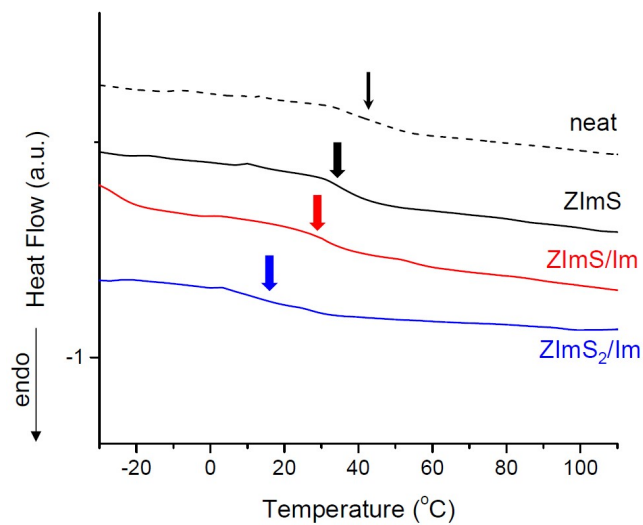

**Supplementary Figure 1. Thermal transitions of PSS:Im-*b*-PMB with additives.** DSC thermograms of PSS:Im-*b*-PMB (1.2-*b*-1.0 kg mol<sup>-1</sup>) containing ZImS, ZImS/Im, and ZImS<sub>2</sub>/Im, compared with that of neat PSS:Im-*b*-PMB, indicating a decrease in the  $T_g$  value of PSS:Im with additives.  $T_g$  of PMB (-68 °C) was not affected by additives.

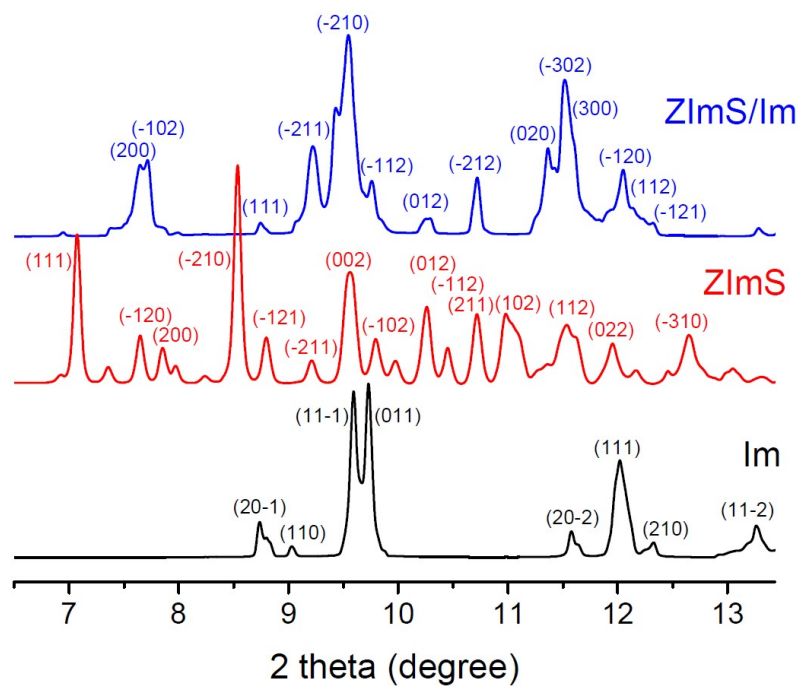

**Supplementary Figure 2. Co-organization of ZImS and Im.** WAXS profiles of neat Im, and neat ZImS, and ZImS/Im. Miller indices of the reflection planes ( $hkl$ ) of each crystal were obtained by Mercury DSD 3.9 software, as given in the figure.

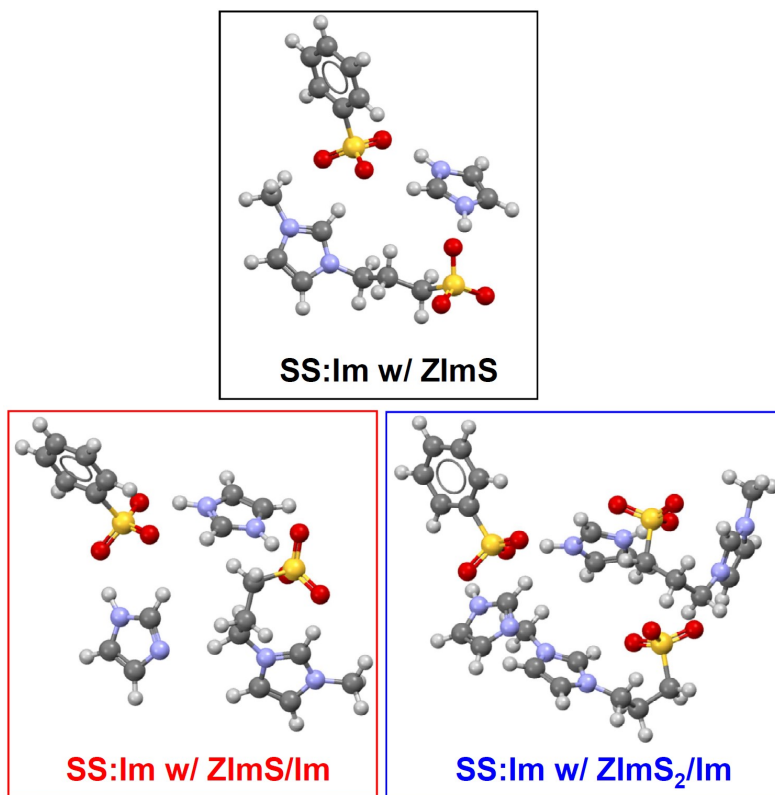

**Supplementary Figure 3. Dissimilar dipolar orientations.** Molecular conformations of SS:Im with incorporated ZImS and neutral Im, for which the geometries had been optimized by *ab initio* calculations based on the density functional theory (B3LYP/6-31G(d)).

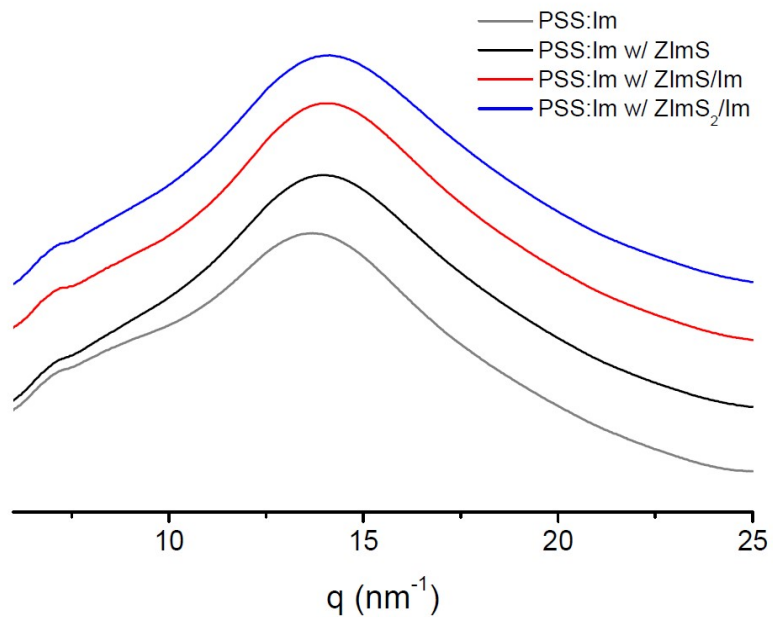

**Supplementary Figure 4. Amorphous characteristics of PSS:Im homopolymers.** WAXS profiles of PSS:Im homopolymers (1.2 kg mol<sup>-1</sup> and sulfonation level of 20 mol.%) comprising ZImS, ZImS/Im, and ZImS<sub>2</sub>/Im, compared with that of neat PSS:Im, measured at 25 °C. It is evident that all samples have amorphous ionic phases.

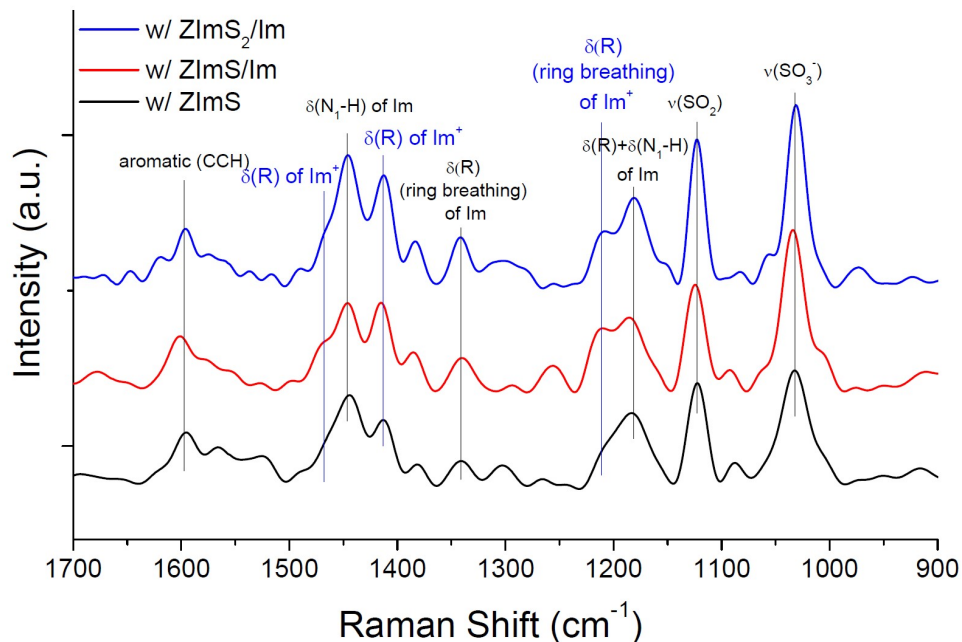

**Supplementary Figure 5. Dissimilar proton dissociation degrees.** Fourier transform Raman spectra of PSS:Im-*b*-PMB comprising ZImS, ZImS/Im, and ZImS<sub>2</sub>/Im over the wavenumber ranges 900 – 1700 cm<sup>-1</sup>. C–CH aromatic ring quadrant of PSS chains (at 1600 cm<sup>-1</sup>) was used as an internal reference. As assigned in the figure, the absorption band at 1210 cm<sup>-1</sup> indicates the ring breathing of Im<sup>+</sup>, whereas that of neutral Im is shown at 1338 cm<sup>-1</sup>. The peak at 1413 cm<sup>-1</sup> signifies CH<sub>3</sub>-N and CH<sub>2</sub>-N stretching of Im<sup>+</sup>, whereas that at 1446 cm<sup>-1</sup> denotes the N-H stretching of neutral Im. From the intensity ratio, e.g.,  $I^{1210}/(I^{1210} + I^{1338})$ , the degree of proton dissociation was calculated as 52%, 65%, and 54% for the samples containing ZImS, ZImS/Im, and ZImS<sub>2</sub>/Im, respectively.

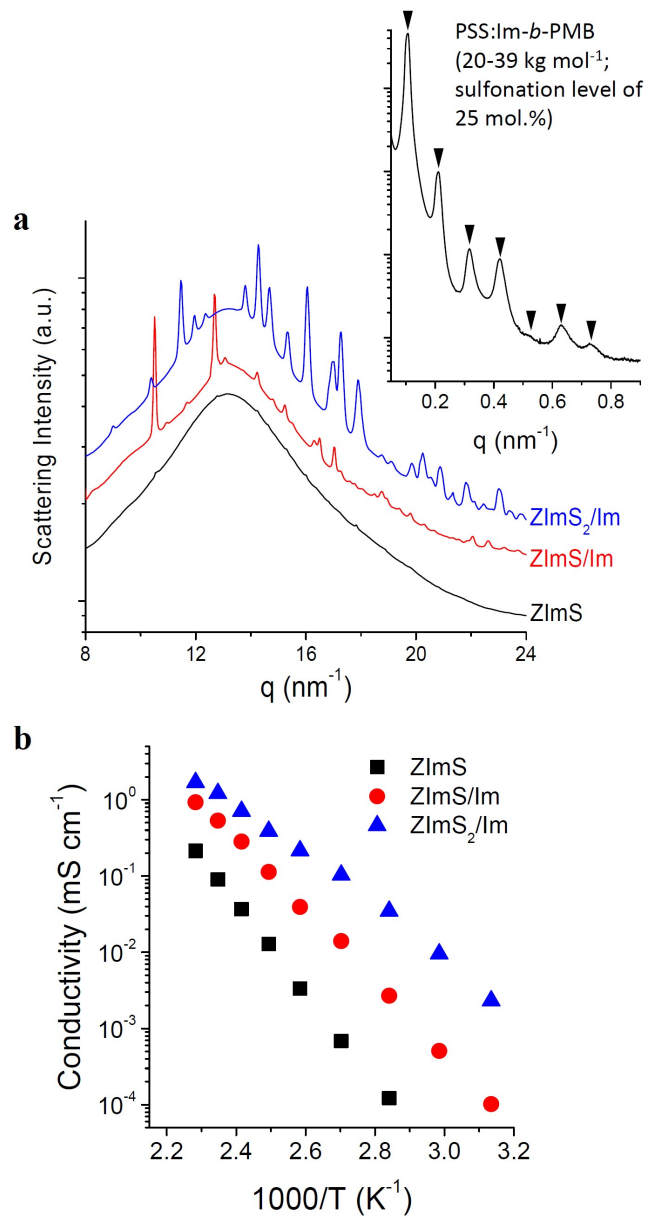

**Supplementary Figure 6. High molecular weight PSS:Im-*b*-PMB comprising additives.**

**a**, WAXS profiles of PSS:Im-*b*-PMB (20-39  $\text{kg mol}^{-1}$  and a sulfonation level of 25 mol.%) comprising ZImS, ZImS/Im, and ZImS<sub>2</sub>/Im, measured at 25 °C. SAXS profile of neat PSS:Im-*b*-PMB displaying lamellar morphology ( $d_{100} = 56$  nm) is shown in the inset. **b**, Temperature-dependent ionic conductivity of PSS:Im-*b*-PMB (20-39  $\text{kg mol}^{-1}$ ) comprising additives.

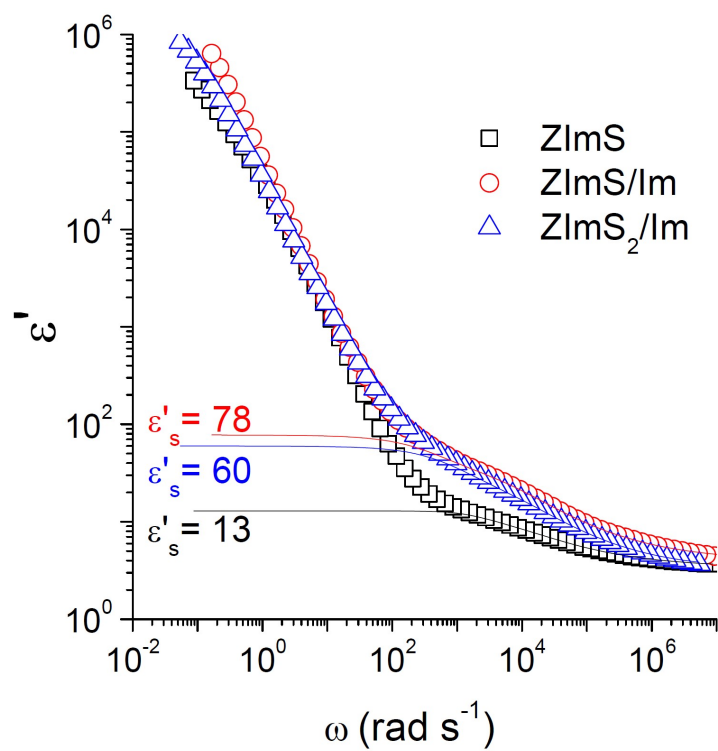

**Supplementary Figure 7. Dielectric relaxation behavior.** Representative dielectric permittivity spectra of PSS:Im-*b*-PMB copolymers with various additives, measured at 60 °C. The spectra with model fits were horizontally shifted to show the static dielectric constants,  $\epsilon_s$ .



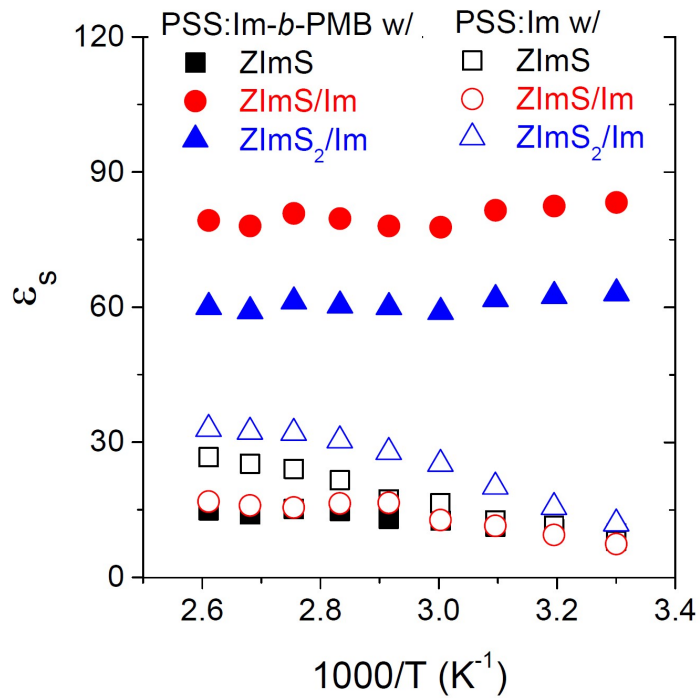

**Supplementary Figure 8. Dissimilar dipolar arrangements.** The static dielectric constants,  $\epsilon_s$ , of PSS:Im-*b*-PMB and PSS:Im with the addition of ZImS, ZImS/Im, and ZImS<sub>2</sub>/Im at different temperatures, revealing dissimilar dipolar arrangements in ionic phases of block copolymers and homopolymers.

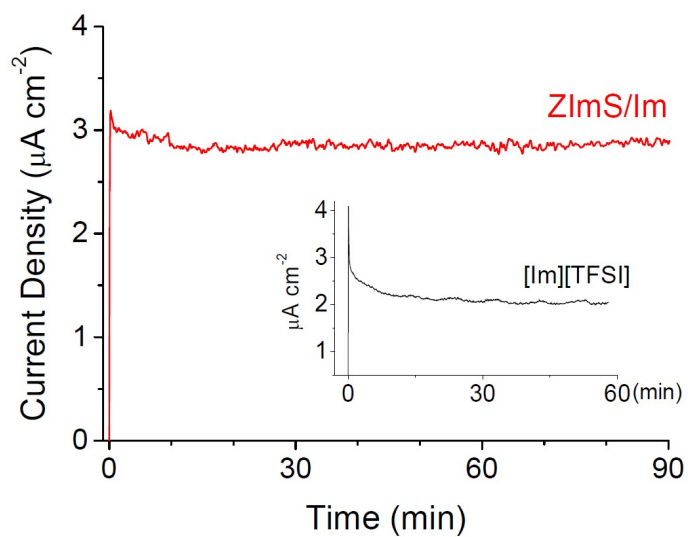

**Supplementary Figure 9. Polarization experiments.** Current density profile of PSS:Im-*b*-PMB containing ZImS/Im, after polarizing the sample with  $\Delta V$  of 100 mV. Symmetric cell was employed by sandwiching the polymer with carbon electrodes. PSS:Im-*b*-PMB containing ionic liquid was used as a control.

## Supplementary Tables

**Supplementary Table 1. Crystal Structures and Lattice Parameters of Neat Im, Neat ZImS, and ZImS/Im Mixture**

|                      | Im         | ZImS       | ZImS/Im      |
|----------------------|------------|------------|--------------|
| Crystal structure    | Monoclinic | Monoclinic | Monoclinic   |
| Space group          | $P2_1/c$   | $P2_1/c$   | $P1m1$       |
| $a$ (Å) ( $\alpha$ ) | 9.8 (90°)  | 9.8 (90°)  | 11.1 (90°)   |
| $b$ (Å) ( $\beta$ )  | 5.5 (117°) | 11.4 (98°) | 7.0 (113.0°) |
| $c$ (Å) ( $\gamma$ ) | 7.8 (90°)  | 8.1 (90°)  | 10.1 (90°)   |

**Supplementary Table 2. Dielectric Relaxation Parameters of PSS:Im-*b*-PMB Block Copolymers Comprising ZImS, ZImS/Im, and ZImS<sub>2</sub>/Im**

| PSS:Im- <i>b</i> -PMB    | Dipolar moiety                                                | Number density <sup>a</sup><br>( $\nu$ , nm <sup>-3</sup> ) | Dipole moment <sup>b</sup><br>( $m$ , D) | $g^c$ | $V_p/V_m^d$ |
|--------------------------|---------------------------------------------------------------|-------------------------------------------------------------|------------------------------------------|-------|-------------|
| w/ ZImS                  | Ion pair<br>(SO <sub>3</sub> <sup>-</sup> – Im <sup>+</sup> ) | 0.36                                                        | 7                                        | 0.4   | 0.8         |
|                          | ZImS                                                          | 0.32                                                        | 17.5                                     |       |             |
| w/ ZImS/Im               | Ion pair<br>(SO <sub>3</sub> <sup>-</sup> – Im <sup>+</sup> ) | 0.32                                                        | 7                                        | 1.9   | 1.1         |
|                          | Neutral pair<br>(Im – ZImS)                                   | 0.39                                                        | 19.3                                     |       |             |
| w/ ZImS <sub>2</sub> /Im | Ion pair<br>(SO <sub>3</sub> <sup>-</sup> – Im <sup>+</sup> ) | 0.27                                                        | 7                                        | 1.1   | 1.5         |
|                          | Neutral pair<br>(Im – ZImS)                                   | 0.32                                                        | 19.3                                     |       |             |
|                          | ZImS                                                          | 0.24                                                        | 17.5                                     |       |             |

<sup>a</sup>estimated from the group contribution method based on molecular structure.

<sup>b</sup>calculated using a DFT exchange-correlation functional, *B3LYP*.

<sup>c</sup>calculated using eq (1) at 343 K

<sup>d</sup>calculated using eq (2) at 343 K
